# Supplementary material
Source: PubMed Central journal article supplement (PMC3625319)
Supplement: 1303944110_pnas.201303944SI.pdf [file 1303944110_pnas.201303944SI.pdf]

# Supporting Information

Fu et al. 10.1073/pnas.1303944110

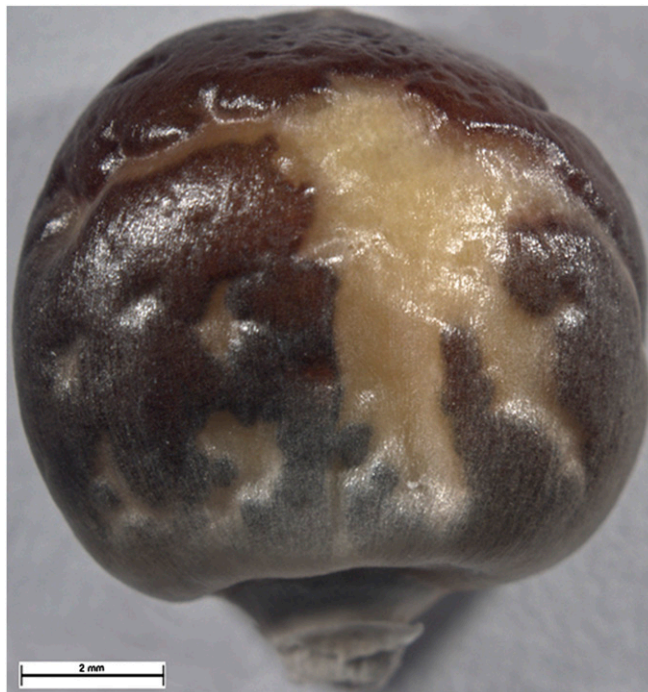

**Fig. S1.** Phenotype of Duplication 3a (Dp3a) kernels. A mature kernel containing the Dp3a chromosome with the dominant alleles of *A1* and *Sh2* in a background of *anthocyaninless1 (a1)* and *shrunken2 (sh2)*, which are revealed by mosaic loss of Dp3a. The *A1* allele produces purple anthocyanin pigment in the aleurone layer, and the *Sh2* allele produces normal starch in the endosperm. When the Dp3a is lost during development of the kernel, sectors are produced that do not have normal starch production and are lacking pigment in the corresponding aleurone. These indented regions are characteristic of mutant starch production and also have no anthocyanin pigment.

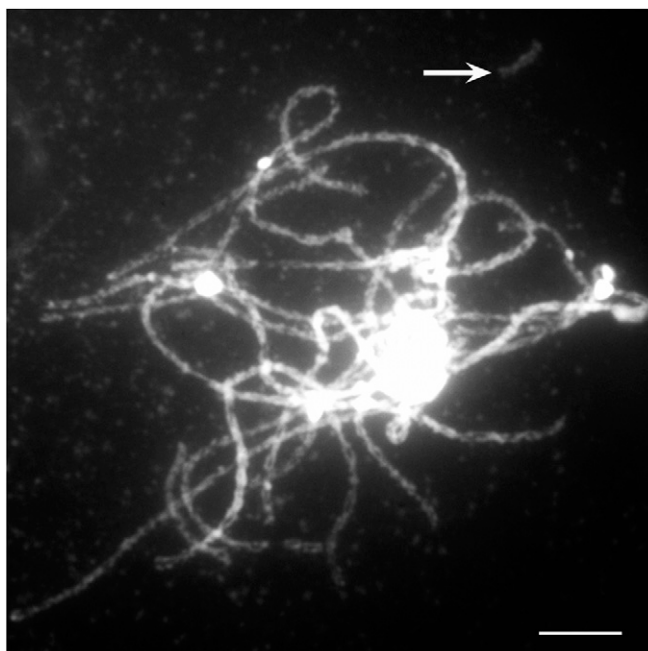

**Fig. S2.** Duplication 3a (Dp3a) in meiotic pachynema. The DAPI-stained pachytene chromosome image was converted to gray value. Arrow indicates that the Dp3a chromosome did not pair with chromosome 3.

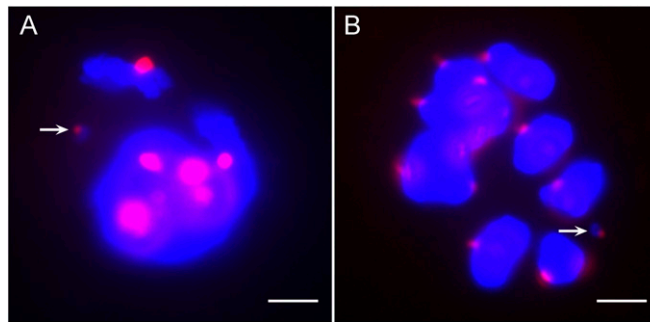

**Fig. 53.** Immunostaining of Dp3a for CENP-C, a foundational kinetochore protein, at different stages of meiosis. Immunolocalization analysis of CENP-C in meiosis of plants containing one Dp3a chromosome. (A) Diplotene. (B) Metaphase I. Red represents the signal of CENP-C, which is a marker for centromere activity. DAPI-stained chromosomes are blue. The arrow denotes the Dp3a chromosome with one site of CENP-C binding. (Scale bars, 10  $\mu\text{m}$ .)

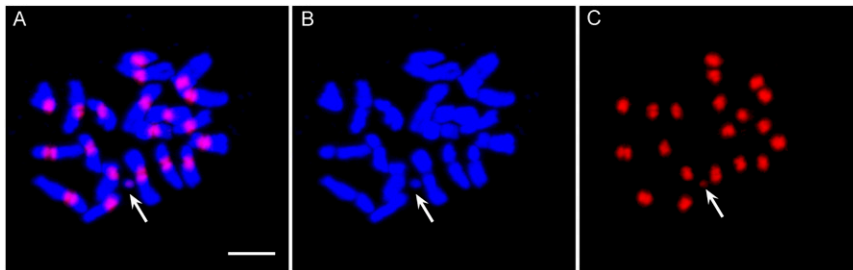

**Fig. 54.** Phosphorylation of H3-ser-10 on the Dp3a somatic chromosome. Immunofluorescence assay using anti-H3S10ph (red) antibody on mitotic metaphase chromosomes. (A) Merged images. (B) DAPI channel. (C) The red channel is the H3S10 antibody. Arrows indicate the Dp3a chromosome. (Scale bar, 10  $\mu\text{m}$ .)

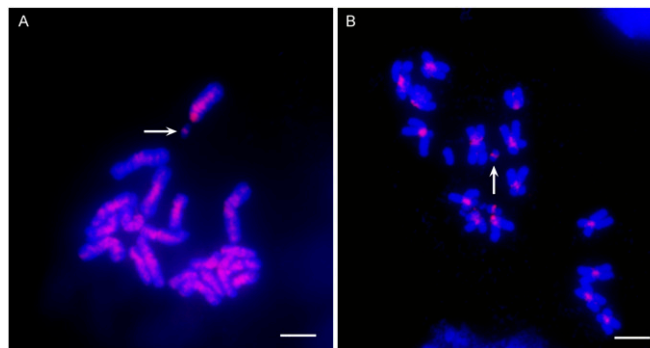

**Fig. 55.** Sites of H3T3 phosphorylation on the Dp3a somatic chromosome. H3T3 phosphorylation antibody localizes in the inner centromeric region during metaphase. (A) Early metaphase. (B) Metaphase. Arrows indicate the Dp3a chromosome. The red channel is H3T3ph antibody; DAPI-stained chromosomes are blue. (Scale bars, 10  $\mu\text{m}$ .)

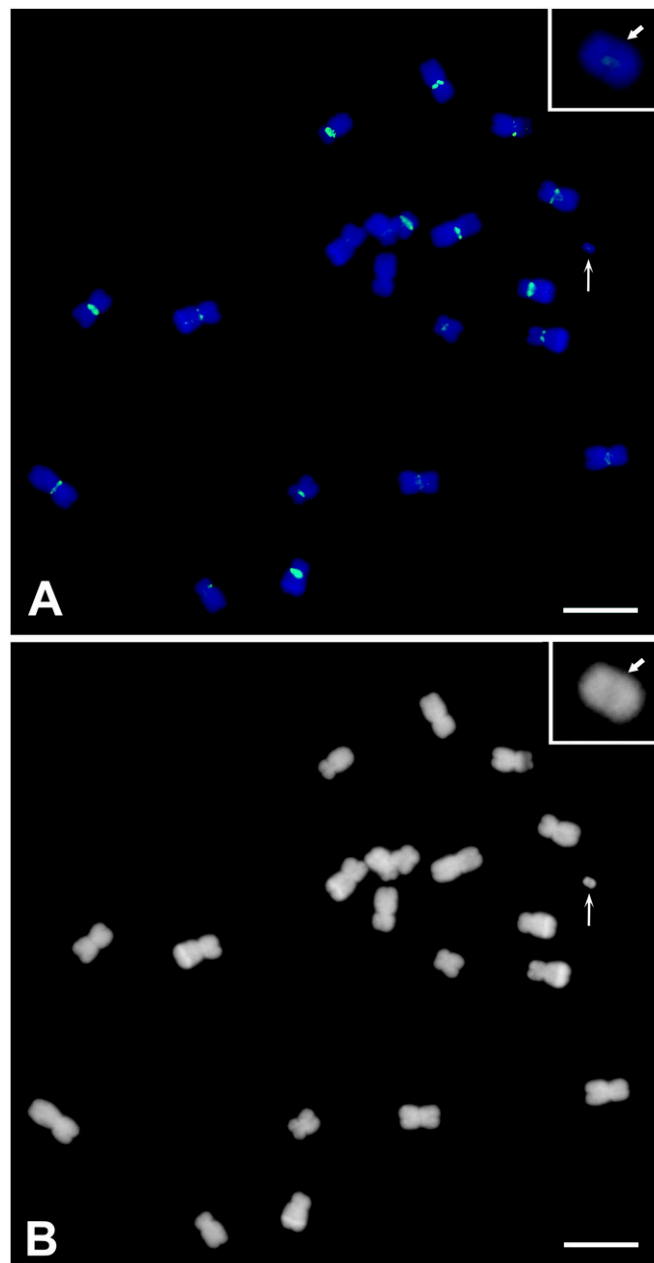

**Fig. S6.** Confirmation of ChIP-DNA location to centromeric regions. (A) FISH analysis using DNA from ChIP as a probe to detect the location of the ChIP-DNA sequences. The green signals indicate that the ChIP-DNA sequences are located in centromere regions. DAPI-stained chromosomes are blue. Arrow designates Dp3a. *Inset* shows an enlarged image of Dp3a. (B) Gray-value image of A. (Scale bar, 10  $\mu\text{m}$ .)

**Table S1.** Mapping results from ChIP-Seq

| Sequence Reads                     | Control, pair-end 100 nt |            | Dp3a, pair-end 100 nt |            |
|------------------------------------|--------------------------|------------|-----------------------|------------|
|                                    | Reads                    | Percentage | Reads                 | Percentage |
| Total reads                        | 51,453,782               | 100        | 30,902,058            | 100        |
| Total mapped                       | 39,326,480               | 76.43      | 23,364,933            | 75.61      |
| Uniquely and nonredundantly mapped | 33,992,185               | 66.06      | 19,700,469            | 63.75      |

**Table S2. Genes located in the 350-kb region of Dp3a**

Fig. 4B

| Gene Number designation | Name             | Protein                                               | Nucleotide position     | CENH3 above control |
|-------------------------|------------------|-------------------------------------------------------|-------------------------|---------------------|
| 1                       | GRMZM2G045565    | Protein of unknown function DUF538 family protein     | 218,891,348–218,892,450 | –                   |
| 2                       | GRMZM2G045318    | Hypothetical protein                                  | 218,893,373–218,896,627 | –                   |
| 3                       | GRMZM5G815568    | Hypothetical protein                                  | 218,893,525–218,896,628 | –                   |
| 4                       | GRMZM2G045275    | Putative early flowering 3-like                       | 218,897,671–218,903,527 | –                   |
| 5                       | GRMZM2G045268    | Like ubiquinol-cytochrome c reductase complex         | 218,910,518–218,916,860 | –                   |
| 6                       | AC207396.3_FG004 | Hypothetical protein                                  | 218,923,790–218,924,035 | +                   |
| 7                       | AC207396.3_FG003 | Hypothetical protein                                  | 218,926,785–218,927,030 | +                   |
| 8                       | AC207396.3_FG002 | Hypothetical protein                                  | 218,927,716–218,928,003 | +                   |
| 9                       | AC207396.3_FG001 | Hypothetical protein                                  | 218,928,547–218,928,792 | –                   |
| 10                      | GRMZM2G125571    | Uncharacterized protein LOC100501661 precursor        | 219,063,340–219,064,565 | +                   |
| 11                      | GRMZM2G342653    | Uncharacterized protein LOC100272281                  | 219,075,234–219,076,412 | +                   |
| 12                      | AC209738.3_FG002 | Uncharacterized protein LOC100272281                  | 219,075,562–219,076,050 | +                   |
| 13                      | AC209738.3_FG003 | Tetratricopeptide repeat domain 4                     | 219,097,302–219,099,416 | +                   |
| 14                      | GRMZM2G342693    | Hypothetical protein                                  | 219,099,193–219,101,141 | +                   |
| 15                      | GRMZM5G882921    | Hypothetical protein                                  | 219,099,460–219,099,789 | +                   |
| 16                      | AC209738.3_FG005 | <i>Zea mays</i> RNA-binding protein (LOC100285689)    | 219,104,042–219,104,893 | –                   |
| 17                      | GRMZM2G342711    | RNA-binding protein                                   | 219,104,793–219,106,389 | –                   |
| 18                      | GRMZM2G342719    | Cell division protein ftsZ                            | 219,107,045–219,108,925 | –                   |
| 19                      | GRMZM2G508066    | Hypothetical protein                                  | 219,111,436–219,111,834 | –                   |
| 20                      | GRMZM2G040905    | Uncharacterized protein LOC100277351                  | 219,117,645–219,126,756 | +                   |
| 21                      | GRMZM2G702260    | <i>Zea mays</i> B73 monoterpene synthase (tps26) gene | 219,164,362–219,164,942 | +                   |
| 22                      | GRMZM2G081816    | bHLH transcription-like                               | 219,181,998–219,184,295 | –                   |

+, binding with CENH3; –, no binding with CENH3.
